# Supplementary material
Source: PubMed Central journal article supplement (PMC7363538)
Supplement: NIHMS1579939-supplement-SuppTable1.pdf [file NIHMS1579939-supplement-SuppTable1.pdf]

Supplementary data. Table 1

| Accession number | Protein description                                                                                                         | Sham                             | ICH                              | Brain injury-induced modulation<br>Upregulation ↑ or<br>Downregulation ↓ |
|------------------|-----------------------------------------------------------------------------------------------------------------------------|----------------------------------|----------------------------------|--------------------------------------------------------------------------|
|                  |                                                                                                                             | Average number of total peptides | Average number of total peptides |                                                                          |
| Q9D7P6           | Iron-sulfur cluster assembly enzyme ISCU, mitochondrial OS=Mus musculus GN=Iscu PE=1 SV=1 - [ISCU_MOUSE]                    | 1.67                             | 0                                | ↓                                                                        |
| Q9D855           | Cytochrome b-c1 complex subunit 7 OS=Mus musculus GN=Uqcrb PE=1 SV=3 - [QCR7_MOUSE]                                         | 1.00                             | 0                                | ↓                                                                        |
| Q59J78           | Mimitin, mitochondrial OS=Mus musculus GN=Ndufaf2 PE=1 SV=1 - [MIMIT_MOUSE]                                                 | 1.00                             | 0                                | ↓                                                                        |
| Q8QZR5           | Alanine aminotransferase 1 OS=Mus musculus GN=Gpt PE=1 SV=3 - [ALAT1_MOUSE]                                                 | 1.00                             | 0                                | ↓                                                                        |
| Q99M51           | Cytoplasmic protein NCK1 OS=Mus musculus GN=Nck1 PE=1 SV=1 - [NCK1_MOUSE]                                                   | 1.00                             | 0                                | ↓                                                                        |
| Q9EP89           | Serine beta-lactamase-like protein LACTB, mitochondrial OS=Mus musculus GN=Lactb PE=1 SV=1 - [LACTB_MOUSE]                  | 1.00                             | 0                                | ↓                                                                        |
| Q9QX11           | Cytohesin-1 OS=Mus musculus GN=Cyth1 PE=1 SV=2 - [CYH1_MOUSE]                                                               | 1.00                             | 0                                | ↓                                                                        |
| Q8BM14           | Lipase member K OS=Mus musculus GN=Lipk PE=2 SV=1 - [LIPK_MOUSE]                                                            | 1.00                             | 0                                | ↓                                                                        |
| Q8JZR6           | Electroneutral sodium bicarbonate exchanger 1 OS=Mus musculus GN=Slc4a8 PE=2 SV=1 - [S4A8_MOUSE]                            | 1.00                             | 0                                | ↓                                                                        |
| P09103           | Protein disulfide-isomerase OS=Mus musculus GN=P4hb PE=1 SV=2 - [PDIA1_MOUSE]                                               | 8.33                             | 10                               | ↑                                                                        |
| P62715           | Serine/threonine-protein phosphatase 2A catalytic subunit beta isoform OS=Mus musculus GN=Ppp2cb PE=1 SV=1 - [PP2AB_MOUSE]  | 9.67                             | 5.5                              | ↓                                                                        |
| Q6P5H2           | Nestin OS=Mus musculus GN=Nes PE=1 SV=1 - [NEST_MOUSE]                                                                      | 0.00                             | 1                                | ↑                                                                        |
| Q9D6J6           | NADH dehydrogenase [ubiquinone] flavoprotein 2, mitochondrial OS=Mus musculus GN=Ndufv2 PE=1 SV=2 - [NDUV2_MOUSE]           | 5.67                             | 1.75                             | ↓                                                                        |
| P63330           | Serine/threonine-protein phosphatase 2A catalytic subunit alpha isoform OS=Mus musculus GN=Ppp2ca PE=1 SV=1 - [PP2AA_MOUSE] | 9.67                             | 5.75                             | ↓                                                                        |
| E9PV24           | Fibrinogen alpha chain OS=Mus musculus GN=Fga PE=1 SV=1 - [FIBA_MOUSE]                                                      | 0.33                             | 10                               | ↑                                                                        |
| Q8BP47           | Asparagine--tRNA ligase, cytoplasmic OS=Mus musculus GN=Nars PE=1 SV=2 - [SYNC_MOUSE]                                       | 5.33                             | 1.5                              | ↓                                                                        |
| Q9WUA3           | ATP-dependent 6-phosphofructokinase, platelet type OS=Mus musculus GN=Pfkp PE=1 SV=1 - [PFKAP_MOUSE]                        | 16.33                            | 10.5                             | ↓                                                                        |
| P70297           | Signal transducing adapter molecule 1 OS=Mus musculus GN=Stam PE=1 SV=3 - [STAM1_MOUSE]                                     | 2.33                             | 0                                | ↓                                                                        |
| P43276           | Histone H1.5 OS=Mus musculus GN=Hist1h1b PE=1 SV=2 - [H15_MOUSE]                                                            | 1.33                             | 0                                | ↓                                                                        |
| A2AGT5           | Cytoskeleton-associated protein 5 OS=Mus musculus GN=Ckap5 PE=1 SV=1 - [CKAP5_MOUSE]                                        | 1.67                             | 0                                | ↓                                                                        |
| Q3V3V9           | Leucine-rich repeat-containing protein 16C OS=Mus musculus GN=Rltp PE=1 SV=2 - [LR16C_MOUSE]                                | 1.67                             | 0                                | ↓                                                                        |
| Q9D1K2           | V-type proton ATPase subunit F OS=Mus musculus GN=Atp6v1f PE=1 SV=2 - [VATF_MOUSE]                                          | 3.67                             | 3                                | ↓                                                                        |
| Q8VCM7           | Fibrinogen gamma chain OS=Mus musculus GN=Fgg PE=1 SV=1 - [FIBG_MOUSE]                                                      | 0.00                             | 8.25                             | ↑                                                                        |
| P60879           | Synaptosomal-associated protein 25 OS=Mus musculus GN=Snap25 PE=1 SV=1 - [SNP25_MOUSE]                                      | 10.33                            | 8.75                             | ↓                                                                        |
| Q91VD9           | NADH-ubiquinone oxidoreductase 75 kDa subunit, mitochondrial OS=Mus musculus GN=Ndufs1 PE=1 SV=2 - [NDUS1_MOUSE]            | 13.67                            | 5.75                             | ↓                                                                        |
| P28660           | Nck-associated protein 1 OS=Mus musculus GN=Nckap1 PE=1 SV=2 - [NCKP1_MOUSE]                                                | 7.00                             | 3.25                             | ↓                                                                        |
| Q61644           | Protein kinase C and casein kinase substrate in neurons protein 1 OS=Mus musculus GN=Pacsin1 PE=1 SV=1 - [PACN1_MOUSE]      | 14.00                            | 9.5                              | ↓                                                                        |
| P19536           | Cytochrome c oxidase subunit 5B, mitochondrial OS=Mus musculus GN=Cox5b PE=1 SV=1 - [COX5B_MOUSE]                           | 2.00                             | 1                                | ↓                                                                        |
| P28271           | Cytoplasmic aconitate hydratase OS=Mus musculus GN=Aco1 PE=1 SV=3 - [ACOC_MOUSE]                                            | 3.67                             | 2.25                             | ↓                                                                        |
| Q8BIF0           | CD99 antigen-like protein 2 OS=Mus musculus GN=Cd99i2 PE=1 SV=1 - [C99L2_MOUSE]                                             | 1.33                             | 0                                | ↓                                                                        |
| Q3TYX3           | SET and MYND domain-containing protein 5 OS=Mus musculus GN=Smyd5 PE=1 SV=2 - [SMYD5_MOUSE]                                 | 1.33                             | 0                                | ↓                                                                        |

Continued

| Accession number | Protein description                                                                                         | Sham                             | ICH                              | Brain injury-induced modulation<br>Upregulation ↑ or<br>Downregulation ↓ |
|------------------|-------------------------------------------------------------------------------------------------------------|----------------------------------|----------------------------------|--------------------------------------------------------------------------|
|                  |                                                                                                             | Average number of total peptides | Average number of total peptides |                                                                          |
| Q9QWG7           | Sulfotransferase family cytosolic 1B member 1 OS=Mus musculus GN=Sult1b1 PE=1 SV=2 - [ST1B1_MOUSE]          | 1.00                             | 0                                | ↓                                                                        |
| Q91VA3           | Calpain-8 OS=Mus musculus GN=Capn8 PE=1 SV=1 - [CAN8_MOUSE]                                                 | 1.00                             | 0                                | ↓                                                                        |
| Q80U40           | RIMS-binding protein 2 OS=Mus musculus GN=Rimbp2 PE=1 SV=3 - [RIMB2_MOUSE]                                  | 1.33                             | 0                                | ↓                                                                        |
| Q9CXW4           | 60S ribosomal protein L11 OS=Mus musculus GN=Rpl11 PE=1 SV=4 - [RL11_MOUSE]                                 | 1.00                             | 0                                | ↓                                                                        |
| Q8BNW9           | Kelch repeat and BTB domain-containing protein 11 OS=Mus musculus GN=Kbtbd11 PE=1 SV=3 - [KBTBB_MOUSE]      | 2.67                             | 0.25                             | ↓                                                                        |
| P13634           | Carbonic anhydrase 1 OS=Mus musculus GN=Ca1 PE=1 SV=4 - [CAH1_MOUSE]                                        | 1.00                             | 8.5                              | ↑                                                                        |
| O70161           | Phosphatidylinositol 4-phosphate 5-kinase type-1 gamma OS=Mus musculus GN=Pip5k1c PE=1 SV=2 - [PI51C_MOUSE] | 7.00                             | 2.75                             | ↓                                                                        |
| Q6IRU5           | Clathrin light chain B OS=Mus musculus GN=Cltb PE=1 SV=1 - [CLCB_MOUSE]                                     | 3.00                             | 2.25                             | ↓                                                                        |
| Q9ERR1           | Nuclear distribution protein nudE-like 1 OS=Mus musculus GN=Ndel1 PE=1 SV=2 - [NDEL1_MOUSE]                 | 1.33                             | 1                                | ↓                                                                        |
| Q9QYB8           | Beta-adducin OS=Mus musculus GN=Add2 PE=1 SV=4 - [ADDB_MOUSE]                                               | 12.33                            | 8                                | ↓                                                                        |
| Q9D404           | 3-oxoacyl-[acyl-carrier-protein] synthase, mitochondrial OS=Mus musculus GN=Oxsm PE=1 SV=1 - [OXSM_MOUSE]   | 2.33                             | 0.25                             | ↓                                                                        |
| P20918           | Plasminogen OS=Mus musculus GN=Plg PE=1 SV=3 - [PLMN_MOUSE]                                                 | 0.00                             | 2                                | ↑                                                                        |
| O35927           | Catenin delta-2 OS=Mus musculus GN=Ctnnd2 PE=1 SV=1 - [CTND2_MOUSE]                                         | 2.33                             | 0.5                              | ↓                                                                        |
| Q3URE1           | Acyl-CoA synthetase family member 3, mitochondrial OS=Mus musculus GN=Acsf3 PE=1 SV=2 - [ACSF3_MOUSE]       | 1.67                             | 2.5                              | ↑                                                                        |
| P32067           | Lupus La protein homolog OS=Mus musculus GN=Ssb PE=1 SV=1 - [LA_MOUSE]                                      | 2.00                             | 0.5                              | ↓                                                                        |
| Q9CR21           | Acyl carrier protein, mitochondrial OS=Mus musculus GN=Ndufab1 PE=1 SV=1 - [ACPM_MOUSE]                     | 2.00                             | 1.75                             | ↓                                                                        |
| Q9D7B6           | Isobutyryl-CoA dehydrogenase, mitochondrial OS=Mus musculus GN=Acad8 PE=1 SV=2 - [ACAD8_MOUSE]              | 4.00                             | 2                                | ↓                                                                        |
| Q9ERT9           | Protein phosphatase 1 regulatory subunit 1A OS=Mus musculus GN=Ppp1r1a PE=1 SV=1 - [PPR1A_MOUSE]            | 1.33                             | 0                                | ↓                                                                        |
| P84099           | 60S ribosomal protein L19 OS=Mus musculus GN=Rpl19 PE=1 SV=1 - [RL19_MOUSE]                                 | 1.00                             | 0                                | ↓                                                                        |
| Q5DTT2           | PH and SEC7 domain-containing protein 1 OS=Mus musculus GN=Psd PE=1 SV=2 - [PSD1_MOUSE]                     | 1.00                             | 0                                | ↓                                                                        |
| Q9JLB0           | MAGUK p55 subfamily member 6 OS=Mus musculus GN=Mpp6 PE=1 SV=1 - [MPP6_MOUSE]                               | 2.33                             | 0.25                             | ↓                                                                        |
| P16330           | 2',3'-cyclic-nucleotide 3'-phosphodiesterase OS=Mus musculus GN=Cnp PE=1 SV=3 - [CN37_MOUSE]                | 19.33                            | 15.5                             | ↓                                                                        |
| Q62188           | Dihydropyrimidinase-related protein 3 OS=Mus musculus GN=Dpysl3 PE=1 SV=1 - [DPYL3_MOUSE]                   | 15.33                            | 14.75                            | ↓                                                                        |
| P28661           | Septin-4 OS=Mus musculus GN=Sept4 PE=1 SV=1 - [SEPT4_MOUSE]                                                 | 3.67                             | 1.75                             | ↓                                                                        |
| P56135           | ATP synthase subunit f, mitochondrial OS=Mus musculus GN=Atp5j2 PE=1 SV=3 - [ATPK_MOUSE]                    | 1.67                             | 1                                | ↓                                                                        |
| Q8C1B7           | Septin-11 OS=Mus musculus GN=Sept11 PE=1 SV=4 - [SEP11_MOUSE]                                               | 10.67                            | 7.75                             | ↓                                                                        |
| Q9Z2Q6           | Septin-5 OS=Mus musculus GN=Sept5 PE=1 SV=2 - [SEPT5_MOUSE]                                                 | 11.33                            | 9.75                             | ↓                                                                        |
| B9EJA2           | Cortactin-binding protein 2 OS=Mus musculus GN=Ctnbp2 PE=1 SV=2 - [CTTB2_MOUSE]                             | 3.67                             | 0.75                             | ↓                                                                        |
| Q8VCT3           | Aminopeptidase B OS=Mus musculus GN=Rnpep PE=1 SV=2 - [AMPB_MOUSE]                                          | 5.33                             | 1.25                             | ↓                                                                        |
| P07356           | Annexin A2 OS=Mus musculus GN=Anxa2 PE=1 SV=2 - [ANXA2_MOUSE]                                               | 0.67                             | 1.75                             | ↑                                                                        |

Continued

| Accession Number | Protein description                                                                                                                                               | Sham                             | ICH                              | Brain injury-induced modulation<br>Upregulation ↑ or<br>Downregulation ↓ |
|------------------|-------------------------------------------------------------------------------------------------------------------------------------------------------------------|----------------------------------|----------------------------------|--------------------------------------------------------------------------|
|                  |                                                                                                                                                                   | Average number of total peptides | Average number of total peptides |                                                                          |
| Q8BLQ9           | Cell adhesion molecule 2 OS=Mus musculus GN=Cadm2 PE=1 SV=2 - [CADM2_MOUSE]                                                                                       | 4.33                             | 2.25                             | ↓                                                                        |
| Q8JZP2           | Synapsin-3 OS=Mus musculus GN=Syn3 PE=1 SV=2 - [SYN3_MOUSE]                                                                                                       | 3.67                             | 2.25                             | ↓                                                                        |
| P11352           | Glutathione peroxidase 1 OS=Mus musculus GN=Gpx1 PE=1 SV=2 - [GPX1_MOUSE]                                                                                         | 1.67                             | 4.5                              | ↑                                                                        |
| Q64433           | 10 kDa heat shock protein, mitochondrial OS=Mus musculus GN=Hspe1 PE=1 SV=2 - [CH10_MOUSE]                                                                        | 5.33                             | 5                                | ↓                                                                        |
| Q9QXM0           | Abhydrolase domain-containing protein 2 OS=Mus musculus GN=Abhd2 PE=1 SV=1 - [ABHD2_MOUSE]                                                                        | 1.00                             | 0                                | ↓                                                                        |
| Q812A2           | SLIT-ROBO Rho GTPase-activating protein 3 OS=Mus musculus GN=Srgap3 PE=1 SV=1 - [SRGP3_MOUSE]                                                                     | 1.33                             | 0                                | ↓                                                                        |
| P22682           | E3 ubiquitin-protein ligase CBL OS=Mus musculus GN=Cbl PE=1 SV=3 - [CBL_MOUSE]                                                                                    | 1.00                             | 0                                | ↓                                                                        |
| Q80XN0           | D-beta-hydroxybutyrate dehydrogenase, mitochondrial OS=Mus musculus GN=Bdh1 PE=1 SV=2 - [BDH_MOUSE]                                                               | 1.33                             | 0.5                              | ↓                                                                        |
| P06800           | Receptor-type tyrosine-protein phosphatase C OS=Mus musculus GN=Ptpcr PE=1 SV=3 - [PTPRC_MOUSE]                                                                   | 1.00                             | 0                                | ↓                                                                        |
| Q9D2G2           | Dihydrolipoyllysine-residue succinyltransferase component of 2-oxoglutarate dehydrogenase complex, mitochondrial OS=Mus musculus GN=Dist PE=1 SV=1 - [ODO2_MOUSE] | 6.33                             | 3.75                             | ↓                                                                        |
| P49615           | Cyclin-dependent-like kinase 5 OS=Mus musculus GN=Cdk5 PE=1 SV=1 - [CDK5_MOUSE]                                                                                   | 5.00                             | 1.25                             | ↓                                                                        |
| Q9CR62           | Mitochondrial 2-oxoglutarate/malate carrier protein OS=Mus musculus GN=Slc25a11 PE=1 SV=3 - [M2OM_MOUSE]                                                          | 8.33                             | 5                                | ↓                                                                        |
| Q63810           | Calcineurin subunit B type 1 OS=Mus musculus GN=Ppp3r1 PE=1 SV=3 - [CANB1_MOUSE]                                                                                  | 9.00                             | 9                                | ↑                                                                        |
| Q62418           | Drebrin-like protein OS=Mus musculus GN=Dbnl PE=1 SV=2 - [DBNL_MOUSE]                                                                                             | 5.00                             | 2                                | ↓                                                                        |
| Q9CYK1           | Tryptophan--tRNA ligase, mitochondrial OS=Mus musculus GN=Wars2 PE=1 SV=2 - [SYWM_MOUSE]                                                                          | 0.67                             | 1                                | ↑                                                                        |
| P60840           | Alpha-endosulfine OS=Mus musculus GN=Ensa PE=1 SV=1 - [ENSA_MOUSE]                                                                                                | 1.67                             | 0                                | ↓                                                                        |
| Q9CQE8           | UPF0568 protein C14orf166 homolog OS=Mus musculus PE=1 SV=1 - [CN166_MOUSE]                                                                                       | 2.67                             | 0.75                             | ↓                                                                        |
| O88447           | Kinesin light chain 1 OS=Mus musculus GN=Klc1 PE=1 SV=3 - [KLC1_MOUSE]                                                                                            | 3.33                             | 1                                | ↓                                                                        |
| Q99LB6           | Methionine adenosyltransferase 2 subunit beta OS=Mus musculus GN=Mat2b PE=1 SV=1 - [MAT2B_MOUSE]                                                                  | 2.33                             | 0.5                              | ↓                                                                        |
| P40240           | CD9 antigen OS=Mus musculus GN=Cd9 PE=1 SV=2 - [CD9_MOUSE]                                                                                                        | 1.00                             | 0                                | ↓                                                                        |
| P11031           | Activated RNA polymerase II transcriptional coactivator p15 OS=Mus musculus GN=Sub1 PE=1 SV=3 - [TCP4_MOUSE]                                                      | 1.00                             | 0                                | ↓                                                                        |
| Q91WD5           | NADH dehydrogenase [ubiquinone] iron-sulfur protein 2, mitochondrial OS=Mus musculus GN=Ndufs2 PE=1 SV=1 - [NDUS2_MOUSE]                                          | 5.00                             | 2.5                              | ↓                                                                        |
| P07724           | Serum albumin OS=Mus musculus GN=Alb PE=1 SV=3 - [ALBU_MOUSE]                                                                                                     | 17.00                            | 26.75                            | ↑                                                                        |
| Q8K0E8           | Fibrinogen beta chain OS=Mus musculus GN=Fgb PE=1 SV=1 - [FIBB_MOUSE]                                                                                             | 0.00                             | 10.75                            | ↑                                                                        |
| Q9CPQ8           | ATP synthase subunit g, mitochondrial OS=Mus musculus GN=Atp5l PE=1 SV=1 - [ATP5L_MOUSE]                                                                          | 1.00                             | 1.25                             | ↓                                                                        |
| Q9D1X0           | Nucleolar protein 3 OS=Mus musculus GN=Nol3 PE=1 SV=1 - [NOL3_MOUSE]                                                                                              | 2.67                             | 0.25                             | ↓                                                                        |
| Q61490           | CD166 antigen OS=Mus musculus GN=Alcam PE=1 SV=3 - [CD166_MOUSE]                                                                                                  | 3.00                             | 0.75                             | ↓                                                                        |
| O88307           | Sortilin-related receptor OS=Mus musculus GN=Sort1 PE=1 SV=3 - [SORL_MOUSE]                                                                                       | 1.33                             | 0.33                             | ↓                                                                        |

Continued

| Accession Number | Protein description                                                                                                      | Sham                             | ICH                              | Brain injury-induced modulation<br>Upregulation ↑ or<br>Downregulation ↓ |
|------------------|--------------------------------------------------------------------------------------------------------------------------|----------------------------------|----------------------------------|--------------------------------------------------------------------------|
|                  |                                                                                                                          | Average number of total peptides | Average number of total peptides |                                                                          |
| Q8BLK3           | Limbic system-associated membrane protein OS=Mus musculus GN=Lsamp PE=1 SV=1 - [LSAMP_MOUSE]                             | 4.00                             | 3.25                             | ↓                                                                        |
| P0C6F1           | Dynein heavy chain 2, axonemal OS=Mus musculus GN=Dnah2 PE=1 SV=1 - [DYH2_MOUSE]                                         | 2.00                             | 0.5                              | ↓                                                                        |
| Q8K3J1           | NADH dehydrogenase [ubiquinone] iron-sulfur protein 8, mitochondrial OS=Mus musculus GN=Ndufs8 PE=1 SV=1 - [NDUS8_MOUSE] | 2.33                             | 1.3                              | ↓                                                                        |
| Q03734           | Serine protease inhibitor A3M OS=Mus musculus GN=Serpina3m PE=1 SV=2 - [SPA3M_MOUSE]                                     | 0.00                             | 5.75                             | ↑                                                                        |
| Q60973           | Histone-binding protein RBBP7 OS=Mus musculus GN=Rbbp7 PE=1 SV=1 - [RBBP7_MOUSE]                                         | 3.33                             | 0.5                              | ↓                                                                        |
| P31725           | Protein S100-A9 OS=Mus musculus GN=S100a9 PE=1 SV=3 - [S10A9_MOUSE]                                                      | 0.00                             | 1.75                             | ↑                                                                        |
| Q91X97           | Neurocalcin-delta OS=Mus musculus GN=Ncald PE=1 SV=4 - [NCALD_MOUSE]                                                     | 5.00                             | 4.25                             | ↓                                                                        |
| P70296           | Phosphatidylethanolamine-binding protein 1 OS=Mus musculus GN=Pebp1 PE=1 SV=3 - [PEBP1_MOUSE]                            | 8.67                             | 8.25                             | ↓                                                                        |
| O88643           | Serine/threonine-protein kinase PAK 1 OS=Mus musculus GN=Pak1 PE=1 SV=1 - [PAK1_MOUSE]                                   | 7.00                             | 3.25                             | ↓                                                                        |
| Q5SQX6           | Cytoplasmic FMR1-interacting protein 2 OS=Mus musculus GN=Cyfp2 PE=1 SV=2 - [CYFP2_MOUSE]                                | 7.00                             | 3                                | ↓                                                                        |
| Q71R19           | Kynurenine--oxoglutarate transaminase 3 OS=Mus musculus GN=Ccbl2 PE=1 SV=1 - [KAT3_MOUSE]                                | 2.67                             | 0                                | ↓                                                                        |
| Q92111           | Serotransferrin OS=Mus musculus GN=Tf PE=1 SV=1 - [TRFE_MOUSE]                                                           | 5.33                             | 20.25                            | ↑                                                                        |
| Q9CZ13           | Cytochrome b-c1 complex subunit 1, mitochondrial OS=Mus musculus GN=Uqcrc1 PE=1 SV=2 - [QCR1_MOUSE]                      | 10.33                            | 9                                | ↓                                                                        |
| Q8R4N0           | Citrate lyase subunit beta-like protein, mitochondrial OS=Mus musculus GN=Clybl PE=1 SV=2 - [CLYBL_MOUSE]                | 4.00                             | 1.5                              | ↓                                                                        |
| O08677           | Kininogen-1 OS=Mus musculus GN=Kng1 PE=1 SV=1 - [KNG1_MOUSE]                                                             | 0.00                             | 1.5                              | ↑                                                                        |
| Q60972           | Histone-binding protein RBBP4 OS=Mus musculus GN=Rbbp4 PE=1 SV=5 - [RBBP4_MOUSE]                                         | 3.67                             | 0.75                             | ↓                                                                        |
| Q0VE82           | Copine-7 OS=Mus musculus GN=Cpne7 PE=1 SV=1 - [CPNE7_MOUSE]                                                              | 1.00                             | 1.25                             | ↑                                                                        |
| P29391           | Ferritin light chain 1 OS=Mus musculus GN=Ftl1 PE=1 SV=2 - [FRIL1_MOUSE]                                                 | 2.00                             | 5.5                              | ↑                                                                        |
| Q64522           | Histone H2A type 2-B OS=Mus musculus GN=Hist2h2ab PE=1 SV=3 - [H2A2B_MOUSE]                                              | 3.00                             | 3                                | ↑                                                                        |
| Q9Z218           | Succinyl-CoA ligase [GDP-forming] subunit beta, mitochondrial OS=Mus musculus GN=Suc1g2 PE=1 SV=3 - [SUCB2_MOUSE]        | 5.67                             | 1.5                              | ↓                                                                        |
| O88712           | C-terminal-binding protein 1 OS=Mus musculus GN=Ctbp1 PE=1 SV=2 - [CTBP1_MOUSE]                                          | 5.33                             | 3.5                              | ↓                                                                        |
| Q00896           | Alpha-1-antitrypsin 1-3 OS=Mus musculus GN=Serpina1c PE=1 SV=2 - [A1AT3_MOUSE]                                           | 0.33                             | 8.25                             | ↑                                                                        |
| P35762           | CD81 antigen OS=Mus musculus GN=Cd81 PE=1 SV=2 - [CD81_MOUSE]                                                            | 3.00                             | 2.75                             | ↓                                                                        |
| Q9JKC6           | Cell cycle exit and neuronal differentiation protein 1 OS=Mus musculus GN=Cend1 PE=1 SV=1 - [CEND_MOUSE]                 | 1.00                             | 0                                | ↓                                                                        |
| Q91VR2           | ATP synthase subunit gamma, mitochondrial OS=Mus musculus GN=Atp5c1 PE=1 SV=1 - [ATPG_MOUSE]                             | 7.00                             | 6.25                             | ↓                                                                        |
| O08539           | Myc box-dependent-interacting protein 1 OS=Mus musculus GN=Bin1 PE=1 SV=1 - [BIN1_MOUSE]                                 | 11.33                            | 8.5                              | ↓                                                                        |
| Q99LX0           | Protein deglycase DJ-1 OS=Mus musculus GN=Park7 PE=1 SV=1 - [PARK7_MOUSE]                                                | 7.33                             | 4.5                              | ↓                                                                        |
| Q9J1I6           | Alcohol dehydrogenase [NADP(+)] OS=Mus musculus GN=Akr1a1 PE=1 SV=3 - [AK1A1_MOUSE]                                      | 5.00                             | 3                                | ↓                                                                        |
| O08532           | Voltage-dependent calcium channel subunit alpha-2/delta-1 OS=Mus musculus GN=Cacna2d1 PE=1 SV=1 - [CA2D1_MOUSE]          | 6.33                             | 2.5                              | ↓                                                                        |

Continued

| Accession Number | Protein description                                                                                      | Sham                             | ICH                              | Brain injury-induced modulation<br>Upregulation ↑ or<br>Downregulation ↓ |
|------------------|----------------------------------------------------------------------------------------------------------|----------------------------------|----------------------------------|--------------------------------------------------------------------------|
|                  |                                                                                                          | Average number of total peptides | Average number of total peptides |                                                                          |
| Q71M36           | Chondroitin sulfate proteoglycan 5 OS=Mus musculus GN=Cspg5 PE=1 SV=2 - [CSPG5_MOUSE]                    | 2.67                             | 0.75                             | ↓                                                                        |
| P02104           | Hemoglobin subunit epsilon-Y2 OS=Mus musculus GN=Hbb-y PE=1 SV=2 - [HBE_MOUSE]                           | 1.00                             | 1.75                             | ↑                                                                        |
| Q3THE2           | Myosin regulatory light chain 12B OS=Mus musculus GN=Myl12b PE=1 SV=2 - [ML12B_MOUSE]                    | 4.67                             | 2.75                             | ↓                                                                        |
| Q3ULJ0           | Glycerol-3-phosphate dehydrogenase 1-like protein OS=Mus musculus GN=Gpd1l PE=1 SV=2 - [GPD1L_MOUSE]     | 8.00                             | 4                                | ↓                                                                        |
| Q8CHG3           | GRIP and coiled-coil domain-containing protein 2 OS=Mus musculus GN=Gcc2 PE=1 SV=2 - [GCC2_MOUSE]        | 0.00                             | 1.25                             | ↑                                                                        |
| P21614           | Vitamin D-binding protein OS=Mus musculus GN=Gc PE=1 SV=2 - [VTDB_MOUSE]                                 | 0.00                             | 2.5                              | ↑                                                                        |
| P62748           | Hippocalcin-like protein 1 OS=Mus musculus GN=Hpcal1 PE=1 SV=2 - [HPCL1_MOUSE]                           | 4.33                             | 3.75                             | ↓                                                                        |
| P35803           | Neuronal membrane glycoprotein M6-b OS=Mus musculus GN=Gpm6b PE=1 SV=2 - [GPM6B_MOUSE]                   | 3.67                             | 2.75                             | ↓                                                                        |
| O70318           | Band 4.1-like protein 2 OS=Mus musculus GN=Epb41l2 PE=1 SV=2 - [E41L2_MOUSE]                             | 5.33                             | 2.75                             | ↓                                                                        |
| Q8BH04           | Phosphoenolpyruvate carboxykinase [GTP], mitochondrial OS=Mus musculus GN=Pck2 PE=1 SV=1 - [PCKGM_MOUSE] | 3.67                             | 0                                | ↓                                                                        |
| O88998           | Noelin OS=Mus musculus GN=Olfn1 PE=1 SV=1 - [NOE1_MOUSE]                                                 | 1.67                             | 0                                | ↓                                                                        |
| Q9JHK4           | Geranylgeranyl transferase type-2 subunit alpha OS=Mus musculus GN=Rabggta PE=1 SV=1 - [PGTA_MOUSE]      | 3.00                             | 0.75                             | ↓                                                                        |
| Q61838           | Alpha-2-macroglobulin OS=Mus musculus GN=A2m PE=1 SV=3 - [A2M_MOUSE]                                     | 0.00                             | 14                               | ↑                                                                        |
| P01942           | Hemoglobin subunit alpha OS=Mus musculus GN=Hba PE=1 SV=2 - [HBA_MOUSE]                                  | 6.00                             | 8                                | ↑                                                                        |
| P28650           | Adenylosuccinate synthetase isozyme 1 OS=Mus musculus GN=Adssl1 PE=1 SV=2 - [PURA1_MOUSE]                | 3.00                             | 1.25                             | ↓                                                                        |
| P04370           | Myelin basic protein OS=Mus musculus GN=Mbp PE=1 SV=2 - [MBP_MOUSE]                                      | 3.00                             | 2.75                             | ↓                                                                        |
| P16858           | Glyceraldehyde-3-phosphate dehydrogenase OS=Mus musculus GN=Gapdh PE=1 SV=2 - [G3P_MOUSE]                | 13.33                            | 13.75                            | ↓                                                                        |
| Q9D023           | Mitochondrial pyruvate carrier 2 OS=Mus musculus GN=Mpc2 PE=1 SV=1 - [MPC2_MOUSE]                        | 1.33                             | 0.25                             | ↓                                                                        |
| P62889           | 60S ribosomal protein L30 OS=Mus musculus GN=Rpl30 PE=1 SV=2 - [RL30_MOUSE]                              | 1.67                             | 2                                | ↑                                                                        |
| Q00623           | Apolipoprotein A-I OS=Mus musculus GN=Apoa1 PE=1 SV=2 - [APOA1_MOUSE]                                    | 0.00                             | 2.75                             | ↑                                                                        |
| P03911           | NADH-ubiquinone oxidoreductase chain 4 OS=Mus musculus GN=Mtnd4 PE=1 SV=1 - [NU4M_MOUSE]                 | 1.33                             | 0.75                             | ↓                                                                        |
| Q9QUR6           | Prolyl endopeptidase OS=Mus musculus GN=Prep PE=1 SV=1 - [PPCE_MOUSE]                                    | 3.67                             | 1.75                             | ↓                                                                        |
| Q61792           | LIM and SH3 domain protein 1 OS=Mus musculus GN=Lasp1 PE=1 SV=1 - [LASP1_MOUSE]                          | 1.67                             | 2                                | ↑                                                                        |
| Q91W43           | Glycine dehydrogenase (decarboxylating), mitochondrial OS=Mus musculus GN=Gldc PE=1 SV=1 - [GCSP_MOUSE]  | 1.67                             | 0.25                             | ↓                                                                        |
| P07759           | Serine protease inhibitor A3K OS=Mus musculus GN=Serpina3k PE=1 SV=2 - [SPA3K_MOUSE]                     | 1.00                             | 13.75                            | ↑                                                                        |
| P62761           | Visinin-like protein 1 OS=Mus musculus GN=Vsnl1 PE=1 SV=2 - [VISL1_MOUSE]                                | 6.33                             | 4.5                              | ↓                                                                        |
| F6ZDS4           | Nucleoprotein TPR OS=Mus musculus GN=Tpr PE=1 SV=1 - [TPR_MOUSE]                                         | 3.00                             | 0.5                              | ↓                                                                        |
| Q8CBE3           | WD repeat-containing protein 37 OS=Mus musculus GN=Wdr37 PE=1 SV=1 - [WDR37_MOUSE]                       | 1.67                             | 0.5                              | ↓                                                                        |
| P47791           | Glutathione reductase, mitochondrial OS=Mus musculus GN=Gsr PE=1 SV=3 - [GSHR_MOUSE]                     | 7.33                             | 3.5                              | ↓                                                                        |
| Q62059           | Versican core protein OS=Mus musculus GN=Vcan PE=1 SV=2 - [CSPG2_MOUSE]                                  | 8.33                             | 4.25                             | ↓                                                                        |
| P84075           | Neuron-specific calcium-binding protein hippocalcin OS=Mus musculus GN=Hpcal1 PE=1 SV=2 - [HPCA_MOUSE]   | 7.33                             | 7                                | ↓                                                                        |

Continued

| Accession Number | Protein description                                                                                                      | Sham                             | ICH                              | Brain injury-induced modulation<br>Upregulation ↑ or<br>Downregulation ↓ |
|------------------|--------------------------------------------------------------------------------------------------------------------------|----------------------------------|----------------------------------|--------------------------------------------------------------------------|
|                  |                                                                                                                          | Average number of total peptides | Average number of total peptides |                                                                          |
| Q80X14           | Phosphatidylinositol 5-phosphate 4-kinase type-2 beta OS=Mus musculus GN=Pip4k2b PE=1 SV=1 - [PI42B_MOUSE]               | 2.67                             | 1.66                             | ↓                                                                        |
| P01027           | Complement C3 OS=Mus musculus GN=C3 PE=1 SV=3 - [CO3_MOUSE]                                                              | 1.00                             | 9.5                              | ↑                                                                        |
| O88935           | Synapsin-1 OS=Mus musculus GN=Syn1 PE=1 SV=2 - [SYN1_MOUSE]                                                              | 21.00                            | 19.25                            | ↓                                                                        |
| Q9QUR7           | Peptidyl-prolyl cis-trans isomerase NIMA-interacting 1 OS=Mus musculus GN=Pin1 PE=1 SV=1 - [PIN1_MOUSE]                  | 3.00                             | 1.25                             | ↓                                                                        |
| Q9CQC7           | NADH dehydrogenase [ubiquinone] 1 beta subcomplex subunit 4 OS=Mus musculus GN=Ndufb4 PE=1 SV=3 - [NDUB4_MOUSE]          | 1.33                             | 0.25                             | ↓                                                                        |
| P21958           | Antigen peptide transporter 1 OS=Mus musculus GN=Tap1 PE=1 SV=3 - [TAP1_MOUSE]                                           | 1.33                             | 0.25                             | ↓                                                                        |
| Q8VEM8           | Phosphate carrier protein, mitochondrial OS=Mus musculus GN=Slc25a3 PE=1 SV=1 - [MPCP_MOUSE]                             | 5.00                             | 3                                | ↓                                                                        |
| P22599           | Alpha-1-antitrypsin 1-2 OS=Mus musculus GN=Serpina1b PE=1 SV=2 - [A1AT2_MOUSE]                                           | 1.00                             | 5.5                              | ↑                                                                        |
| Q9Z1S5           | Neuronal-specific septin-3 OS=Mus musculus GN=Sept3 PE=1 SV=2 - [SEPT3_MOUSE]                                            | 6.00                             | 4.75                             | ↓                                                                        |
| P57780           | Alpha-actinin-4 OS=Mus musculus GN=Actn4 PE=1 SV=1 - [ACTN4_MOUSE]                                                       | 20.00                            | 11.5                             | ↓                                                                        |
| Q923D2           | Flavin reductase (NADPH) OS=Mus musculus GN=Blvrb PE=1 SV=3 - [BLVRB_MOUSE]                                              | 2.67                             | 5.75                             | ↑                                                                        |
| O88952           | Protein lin-7 homolog C OS=Mus musculus GN=Lin7c PE=1 SV=2 - [LIN7C_MOUSE]                                               | 2.67                             | 1                                | ↓                                                                        |
| P02088           | Hemoglobin subunit beta-1 OS=Mus musculus GN=Hbb-b1 PE=1 SV=2 - [HBB1_MOUSE]                                             | 11.33                            | 15                               | ↑                                                                        |
| Q9R0Q6           | Actin-related protein 2/3 complex subunit 1A OS=Mus musculus GN=Arpc1a PE=1 SV=1 - [ARC1A_MOUSE]                         | 10.00                            | 8.75                             | ↓                                                                        |
| P63158           | High mobility group protein B1 OS=Mus musculus GN=Hmgb1 PE=1 SV=2 - [HMGB1_MOUSE]                                        | 0.33                             | 1                                | ↑                                                                        |
| P99028           | Cytochrome b-c1 complex subunit 6, mitochondrial OS=Mus musculus GN=Uqcrc PE=1 SV=2 - [QCR6_MOUSE]                       | 1.00                             | 1                                | ↓                                                                        |
| Q9CWZ7           | Gamma-soluble NSF attachment protein OS=Mus musculus GN=Napg PE=1 SV=1 - [SNAG_MOUSE]                                    | 6.33                             | 3.5                              | ↓                                                                        |
| Q9CWS0           | N(G),N(G)-dimethylarginine dimethylaminohydrolase 1 OS=Mus musculus GN=Ddah1 PE=1 SV=3 - [DDAH1_MOUSE]                   | 7.00                             | 2.75                             | ↓                                                                        |
| P52503           | NADH dehydrogenase [ubiquinone] iron-sulfur protein 6, mitochondrial OS=Mus musculus GN=Ndufs6 PE=1 SV=2 - [NDUS6_MOUSE] | 1.67                             | 0.25                             | ↓                                                                        |
| P47857           | ATP-dependent 6-phosphofructokinase, muscle type OS=Mus musculus GN=Pfkcm PE=1 SV=3 - [PFKAM_MOUSE]                      | 22.67                            | 20.25                            | ↓                                                                        |
| P10639           | Thioredoxin OS=Mus musculus GN=Txn PE=1 SV=3 - [THIO_MOUSE]                                                              | 2.67                             | 3.25                             | ↑                                                                        |
| Q91V09           | WD repeat-containing protein 13 OS=Mus musculus GN=Wdr13 PE=1 SV=1 - [WDR13_MOUSE]                                       | 1.67                             | 0.5                              | ↓                                                                        |
| P62137           | Serine/threonine-protein phosphatase PP1-alpha catalytic subunit OS=Mus musculus GN=Ppp1ca PE=1 SV=1 - [PP1A_MOUSE]      | 13.33                            | 9                                | ↓                                                                        |
| Q9ERG2           | Striatin-3 OS=Mus musculus GN=Strn3 PE=1 SV=1 - [STRN3_MOUSE]                                                            | 2.00                             | 0.5                              | ↓                                                                        |
| Q60864           | Stress-induced-phosphoprotein 1 OS=Mus musculus GN=Stip1 PE=1 SV=1 - [STIP1_MOUSE]                                       | 11.00                            | 7.25                             | ↓                                                                        |
| Q00897           | Alpha-1-antitrypsin 1-4 OS=Mus musculus GN=Serpina1d PE=1 SV=1 - [A1AT4_MOUSE]                                           | 0.33                             | 5                                | ↑                                                                        |
| Q9DCS3           | Trans-2-enoyl-CoA reductase, mitochondrial OS=Mus musculus GN=Mecr PE=1 SV=2 - [MECR_MOUSE]                              | 1.67                             | 0.25                             | ↓                                                                        |
| P47754           | F-actin-capping protein subunit alpha-2 OS=Mus musculus GN=Capza2 PE=1 SV=3 - [CAZA2_MOUSE]                              | 9.33                             | 9.25                             | ↑                                                                        |
| O70435           | Proteasome subunit alpha type-3 OS=Mus musculus GN=Pasma3 PE=1 SV=3 - [PSA3_MOUSE]                                       | 3.00                             | 1.75                             | ↓                                                                        |
| Q6P3A8           | 2-oxoisovalerate dehydrogenase subunit beta, mitochondrial OS=Mus musculus GN=Bckdhb PE=1 SV=2 - [ODBB_MOUSE]            | 1.33                             | 2                                | ↑                                                                        |

Continued

| Accession Number | Protein description                                                                                                             | Sham                             | ICH                              | Brain injury-induced modulation<br>Upregulation ↑ or<br>Downregulation ↓ |
|------------------|---------------------------------------------------------------------------------------------------------------------------------|----------------------------------|----------------------------------|--------------------------------------------------------------------------|
|                  |                                                                                                                                 | Average number of total peptides | Average number of total peptides |                                                                          |
| Q9Z0P5           | Twinfilin-2 OS=Mus musculus GN=Twf2 PE=1 SV=1 - [TWF2_MOUSE]                                                                    | 4.00                             | 1.5                              | ↓                                                                        |
| Q9JJU8           | SH3 domain-binding glutamic acid-rich-like protein OS=Mus musculus GN=Sh3bgrl PE=1 SV=1 - [SH3L1_MOUSE]                         | 3.33                             | 1                                | ↓                                                                        |
| Q91WP6           | Serine protease inhibitor A3N OS=Mus musculus GN=Serpina3n PE=1 SV=1 - [SPA3N_MOUSE]                                            | 0.00                             | 2                                | ↑                                                                        |
| O35625           | Axin-1 OS=Mus musculus GN=Axin1 PE=1 SV=3 - [AXIN1_MOUSE]                                                                       | 1.00                             | 0.25                             | ↓                                                                        |
| Q61885           | Myelin-oligodendrocyte glycoprotein OS=Mus musculus GN=Mog PE=1 SV=1 - [MOG_MOUSE]                                              | 1.33                             | 1.5                              | ↑                                                                        |
| Q9DC69           | NADH dehydrogenase [ubiquinone] 1 alpha subcomplex subunit 9, mitochondrial OS=Mus musculus GN=Ndufa9 PE=1 SV=2 - [NDUA9_MOUSE] | 4.33                             | 2.25                             | ↓                                                                        |
| P14901           | Heme oxygenase 1 OS=Mus musculus GN=Hmox1 PE=1 SV=1 - [HMOX1_MOUSE]                                                             | 0.00                             | 2.25                             | ↑                                                                        |
| Q9CVB6           | Actin-related protein 2/3 complex subunit 2 OS=Mus musculus GN=Arpc2 PE=1 SV=3 - [ARPC2_MOUSE]                                  | 10.00                            | 5.75                             | ↓                                                                        |
| Q9WVJ2           | 26S proteasome non-ATPase regulatory subunit 13 OS=Mus musculus GN=Psmc13 PE=1 SV=1 - [PSD13_MOUSE]                             | 0.33                             | 1                                | ↑                                                                        |
| Q8BYR5           | Calcium-dependent secretion activator 2 OS=Mus musculus GN=Cadps2 PE=1 SV=2 - [CAPS2_MOUSE]                                     | 5.33                             | 3                                | ↓                                                                        |
| Q9CR68           | Cytochrome b-c1 complex subunit Rieske, mitochondrial OS=Mus musculus GN=Uqcrcf1 PE=1 SV=1 - [UCRI_MOUSE]                       | 5.00                             | 3.5                              | ↓                                                                        |
| Q9DB20           | ATP synthase subunit O, mitochondrial OS=Mus musculus GN=Atp5o PE=1 SV=1 - [ATPO_MOUSE]                                         | 7.00                             | 5.5                              | ↓                                                                        |
| Q9R0P3           | S-formylglutathione hydrolase OS=Mus musculus GN=Esd PE=1 SV=1 - [ESTD_MOUSE]                                                   | 5.00                             | 4.25                             | ↓                                                                        |
| P61982           | 14-3-3 protein gamma OS=Mus musculus GN=Ywhag PE=1 SV=2 - [1433G_MOUSE]                                                         | 8.33                             | 8                                | ↓                                                                        |
| Q9CQJ8           | NADH dehydrogenase [ubiquinone] 1 beta subcomplex subunit 9 OS=Mus musculus GN=Ndufb9 PE=1 SV=3 - [NDUB9_MOUSE]                 | 2.00                             | 0.25                             | ↓                                                                        |
| Q62420           | Endophilin-A1 OS=Mus musculus GN=Sh3gl2 PE=1 SV=2 - [SH3G2_MOUSE]                                                               | 10.67                            | 8.25                             | ↓                                                                        |
| O35215           | D-dopachrome decarboxylase OS=Mus musculus GN=Ddt PE=1 SV=3 - [DOPD_MOUSE]                                                      | 4.33                             | 2.75                             | ↓                                                                        |
| Q99JY9           | Actin-related protein 3 OS=Mus musculus GN=Actr3 PE=1 SV=3 - [ARP3_MOUSE]                                                       | 14.33                            | 10.75                            | ↓                                                                        |
| P54227           | Stathmin OS=Mus musculus GN=Stmn1 PE=1 SV=2 - [STMN1_MOUSE]                                                                     | 4.00                             | 3.5                              | ↓                                                                        |
| Q61831           | Mitogen-activated protein kinase 10 OS=Mus musculus GN=Mapk10 PE=1 SV=2 - [MK10_MOUSE]                                          | 2.67                             | 1.25                             | ↓                                                                        |
| Q9QXS6           | Drebrin OS=Mus musculus GN=Dbn1 PE=1 SV=4 - [DREB_MOUSE]                                                                        | 13.33                            | 9.75                             | ↓                                                                        |
| Q61704           | Inter-alpha-trypsin inhibitor heavy chain H3 OS=Mus musculus GN=Itih3 PE=1 SV=3 - [ITIH3_MOUSE]                                 | 0.33                             | 3                                | ↑                                                                        |
| P62242           | 40S ribosomal protein S8 OS=Mus musculus GN=Rps8 PE=1 SV=2 - [RS8_MOUSE]                                                        | 1.67                             | 2.5                              | ↑                                                                        |
| Q9D8Y0           | EF-hand domain-containing protein D2 OS=Mus musculus GN=Efh2 PE=1 SV=1 - [EFHD2_MOUSE]                                          | 8.00                             | 7                                | ↓                                                                        |
| Q8K0S0           | Phytanoyl-CoA hydroxylase-interacting protein OS=Mus musculus GN=Phyhip PE=1 SV=1 - [PHYIP_MOUSE]                               | 7.67                             | 4                                | ↓                                                                        |
| Q9DCU6           | 39S ribosomal protein L4, mitochondrial OS=Mus musculus GN=Mrpl4 PE=1 SV=1 - [RM04_MOUSE]                                       | 1.00                             | 1                                | ↑                                                                        |
| Q99MR8           | Methylcrotonoyl-CoA carboxylase subunit alpha, mitochondrial OS=Mus musculus GN=Mccc1 PE=1 SV=2 - [MCCA_MOUSE]                  | 4.67                             | 0.75                             | ↓                                                                        |
| P56212           | cAMP-regulated phosphoprotein 19 OS=Mus musculus GN=Arpp19 PE=1 SV=2 - [ARP19_MOUSE]                                            | 2.67                             | 0.75                             | ↓                                                                        |
